# Supplementary material for: Sex-Dependent Variations in Hypothalamic Fatty Acid Profile and Neuropeptides in Offspring Exposed to Maternal Obesity and High-Fat Diet
Source: MDPI journal article supplement (doi:10.3390/nu16030340), 2024-01-24
Supplement: s1 [file s1]

## Supplementary

**Table S1. Nutritional composition.** Control Diet Research Diet D12450B, New Brunswick, NJ, USA.

| Control Diet      |                                        |           |
|-------------------|----------------------------------------|-----------|
| Class description | Ingredients                            | Grams     |
| Protein           | Casein, Lactic, 30 Mesh                | 200.00 g  |
| Protein           | Cystine, L                             | 3.00 g    |
| Carbohydrate      | Sucrose, Fine Granulated               | 354.00 g  |
| Carbohydrate      | Starch, Corn                           | 315.00 g  |
| Carbohydrate      | Lodex 10                               | 35.00 g   |
| Fiber             | Solka Floc, FCC200                     | 50.00 g   |
| Fat               | Soybean Oil, USP                       | 25.00 g   |
| Fat               | Lard                                   | 20.00 g   |
| Mineral           | S10026B                                | 50.00 g   |
| Vitamin           | Choline Bitartrate                     | 2.00 g    |
| Vitamin           | V10001C                                | 1.00 g    |
| Dye               | Dye, Yellow FD&C #5, Alum. Lake 35-42% | 0.05 g    |
| Total:            |                                        | 1055.05 g |

**Table S2. Nutritional Composition.** High Fat Research Diet D12451, New Brunswick, NJ, USA.

| High Fat Diet     |                                      |          |
|-------------------|--------------------------------------|----------|
| Class description | Ingredients                          | Grams    |
| Protein           | Casein, Lactic, 30 Mesh              | 200.00 g |
| Protein           | Cystine, L                           | 3.00 g   |
| Carbohydrate      | Sucrose, Fine Granulated             | 176.80 g |
| Carbohydrate      | Lodex 10                             | 100.00 g |
| Carbohydrate      | Starch, Corn                         | 72.80 g  |
| Fiber             | Solka Floc, FCC200                   | 50.00 g  |
| Fat               | Lard                                 | 177.50 g |
| Fat               | Soybean Oil, USP                     | 25.00 g  |
| Mineral           | <u>S10026B</u>                       | 50.00 g  |
| Vitamin           | Choline Bitartrate                   | 2.00 g   |
| Vitamin           | <u>V10001C</u>                       | 1.00 g   |
| Dye               | Dye, Red FD&C #40, Alum. Lake 35-42% | 0.05 g   |
| Total:            |                                      | 858.15 g |

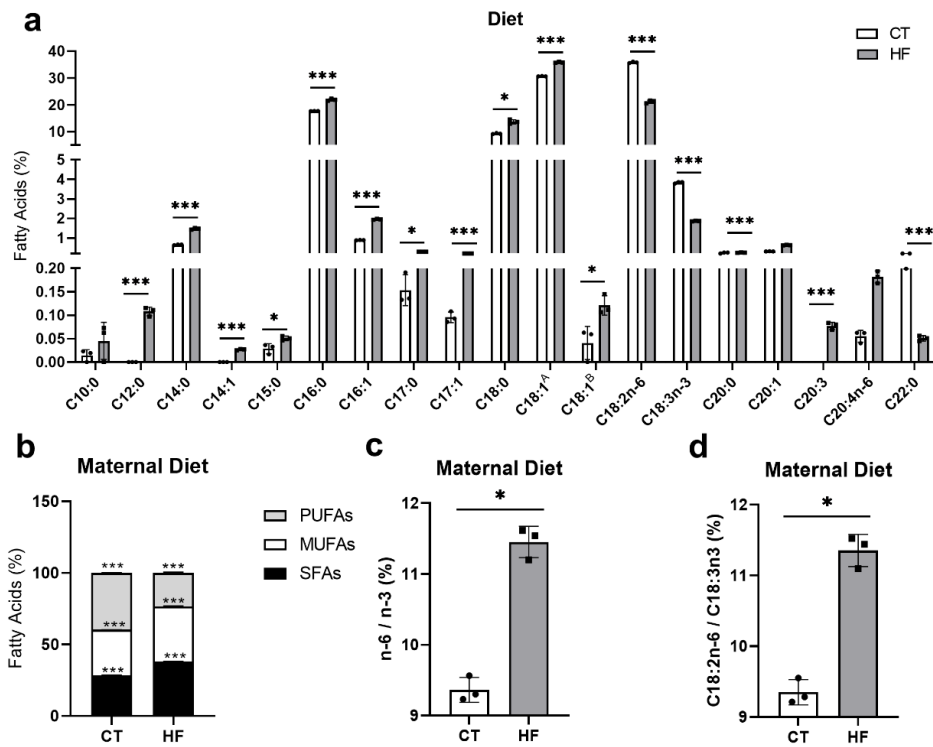

**Figure S1. Diet fatty acids profile.** (a) Relative amount of hypothalamic fatty acid (%):Decanoic acid, methyl ester (C10:0); Dodecanoic acid, methyl ester (C12:0); Methyl tetradecanoate (C14:0); Pentadecanoic acid, methyl ester (C15:0); Hexadecanoic acid, methyl ester (C16:0); 9-Hexadecenoic acid, methyl ester, (Z)- (C16:1); Heptadecanoic acid, methyl ester (C17:0); cis-10-Heptadecenoic acid, methyl ester (C17:1); Methyl stearate (C18:0); 9-Octadecenoic acid, methyl ester, (E)- (C18:1 A);11-Octadecenoic acid, methyl ester (Trans) (C18:1 B); 9,12-Octadecadienoic acid (Z,Z)-, methyl ester, n-6 (C18:2,n-6); 9,12,15-Octadecatrienoic acid, methyl ester, (Z,Z,Z)(n-3)(C18:3,n-3); Eicosanoic acid, methyl ester (C20:0); 11-Eicosenoic acid, methyl ester (C20:1); 7,10,13-Eicosatrienoic acid, methyl ester (C20:3); 5,8,11,14-Eicosatetraenoic acid, methyl ester, (all-Z), n-6 (C20:4n-6); Docosanoic acid, methyl ester (C22:0). (b) Hypothalamic Saturated Fatty Acids (SFAs), Monounsaturated Fatty Acids (MUFAs), Polyunsaturated Fatty Acids (PUFAs), (c) Ratio of omega 6 (n-6) to omega 3 (n-3) in maternal diet. (d) ratio of C18:2n-6 to C18:3n-3. Unpaired t-test or Mann-Whitney test were used in all analysis to compare CT and HF group. Spearman or Pearson test was used to analyze the correlations (\* p < 0.05).

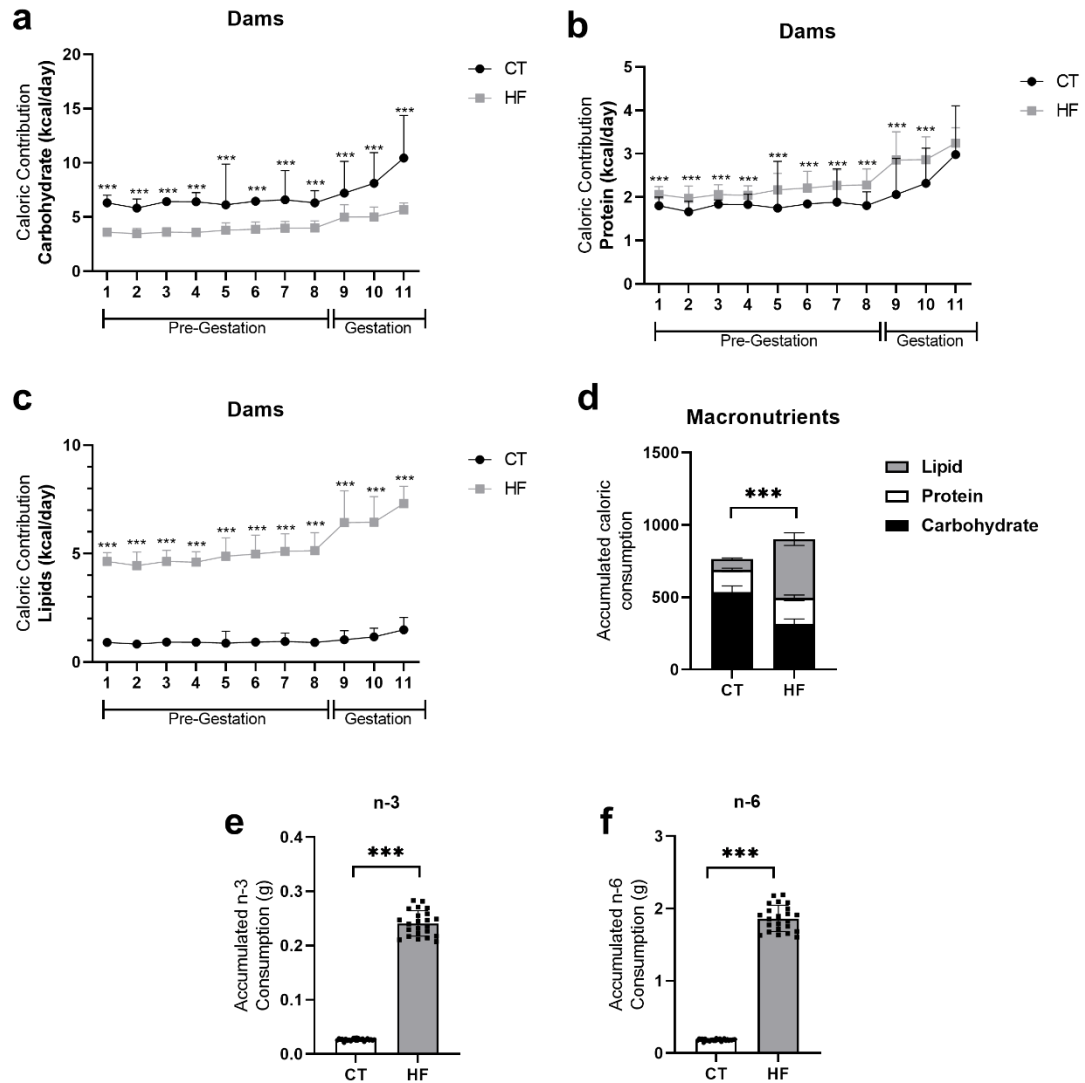

**Figure S2.** Caloric contribution of macronutrient intake of females fed high fat (HF) or control (CT) diet. (a) Caloric contribution of carbohydrates, (b) proteins and (c) lipids throughout the experimental period. Cumulative caloric contribution of (d) macronutrients, (e) omega-3 (n-3) and (f) omega-6 (n-6). Bars represent the mean  $\pm$  standard deviation. Unpaired t-test, Mann-Whitney test or Two-way Anova were used in all analysis to compare CT and HF group at significance level (\*  $p < 0.05$ , \*\*\* $p < 0.001$ ).

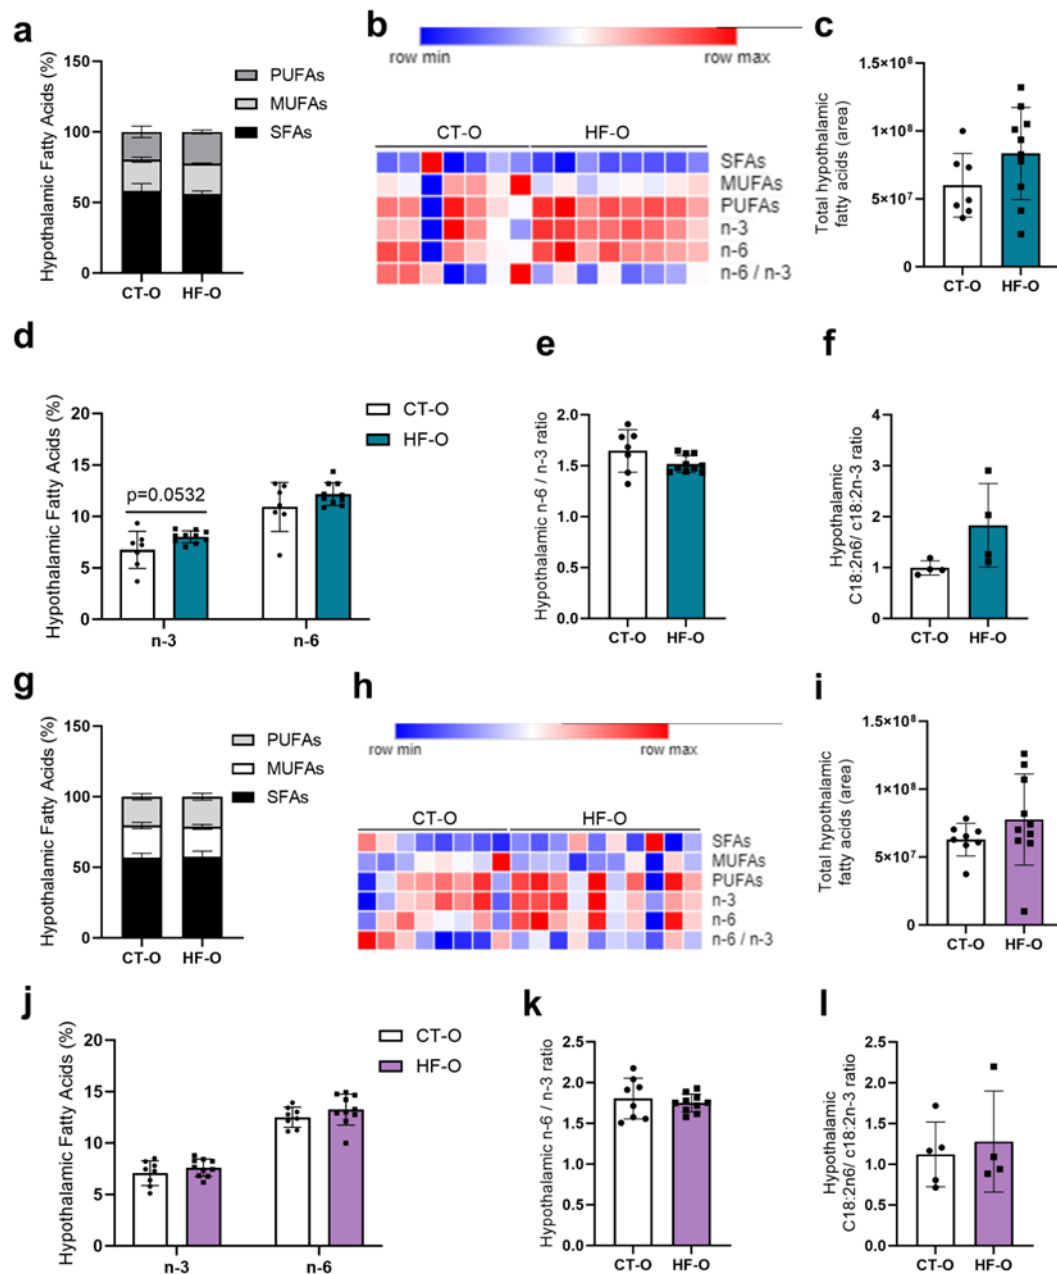

**Figure S3.** Fetal hypothalamic fatty acids profile. (a) Male hypothalamic Saturated Fatty Acids (SFAs), Monounsaturated Fatty Acids (MUFAs), Polyunsaturated Fatty Acids (PUFAs) proportion (CT-O n=7, HF-O n=10). (b) Male heat map by hypothalamic SFAs, MUFAs, PUFAs,  $\omega$ 3 (n-3) and  $\omega$ 6 (n-6) (CT-O n=7, HF-O n=10). (c) Male total hypothalamus fatty acids (area) (CT-O n=8, HF-O n=10). (d) Male hypothalamic proportion (%) of n-3 and n-6 (CT-O n=7, HF-O n=10). (e) Male n-6 to n-3 ratio in the hypothalamus (CT-O n=7, HF-O n=10). (f) Male hypothalamic ratio of C18:2n-6 to C18:3n-3 (CT-O n=4, HF-O n=4). (g) Female hypothalamic Saturated Fatty Acids (SFAs), Monounsaturated Fatty Acids (MUFAs), Polyunsaturated Fatty Acids (PUFAs) proportion (CT-O n=8, HF-O n=10). (h) Female heat map by hypothalamic SFAs, MUFAs, PUFAs, n-3 and n-6 (CT-O n=8, HF-O n=10). (i) Female total hypothalamus fatty acids (area) (CT-O n=8, HF-O n=10). (j) Female hypothalamic proportion (%) of n-3 and n-6 (CT-O n=8, HF-O n=10). (k) Female n-6 to n-3 ratio in the hypothalamus (CT-O n=8, HF-O n=10). (l) Female hypothalamic ratio of C18:2n-6 to C18:3n-3 (CT-O n=5, HF-O n=4). Spearman or Pearson test was used to analyze the correlations (\* p < 0.05).
